# Supplementary material for: Characterization of Komagataeibacter Isolate Reveals New Prospects in Waste Stream Valorization for Bacterial Cellulose Production
Source: MDPI journal article supplement (doi:10.3390/microorganisms9112230), 2021-10-26
Supplement: s1 [file s1]

# Characterization of *Komagataeibacter* isolate reveals new prospects in waste stream valorization for bacterial cellulose production

Pietro Cannazza <sup>1,\*</sup>, Antti J Rissanen <sup>2</sup>, Dieval Guizelini <sup>3</sup>, Pauli Losoi <sup>2</sup>, Essi Sarlin <sup>2</sup>, Diego Romano <sup>1</sup>, Ville Santala <sup>2</sup> and Rahul Mangayil <sup>2,\*</sup>

<sup>1</sup> Department of Food, Environmental and Nutritional Sciences (DeFENS), University of Milan, Via Celoria 2, 20133 Milan, Italy

<sup>2</sup> Faculty of Engineering and Natural Sciences, Tampere University, Tampere, Finland

<sup>3</sup> Graduate Program in Bioinformatics, Sector of Professional and Technological Education, Federal University of Parana (UFPR), Curitiba, PR, Brazil

## Corresponding Authors:

Rahul Mangayil

Korkeakoulunkatu 6, Tampere, 33720, Finland

Email address: rahul.mangayil@tuni.fi

Pietro Cannazza

Via Celoria 2, Milan, 20133, Italy

Pietro.cannazza@unimi.it

Supplementary figures

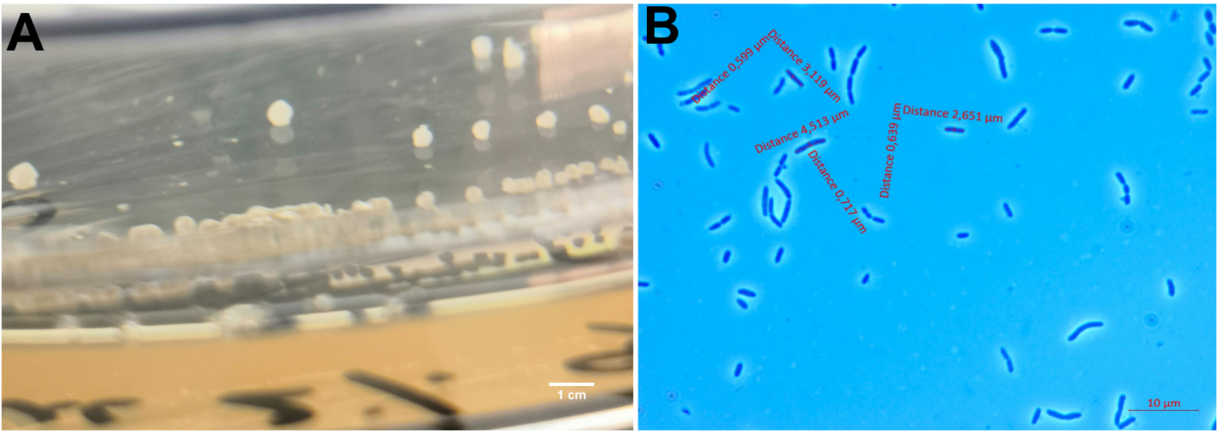

Figure S1: (A) Colony and (B) cell morphologies of ENS9b. The images were cropped and brightness and contrast were adjusted to improve clarity

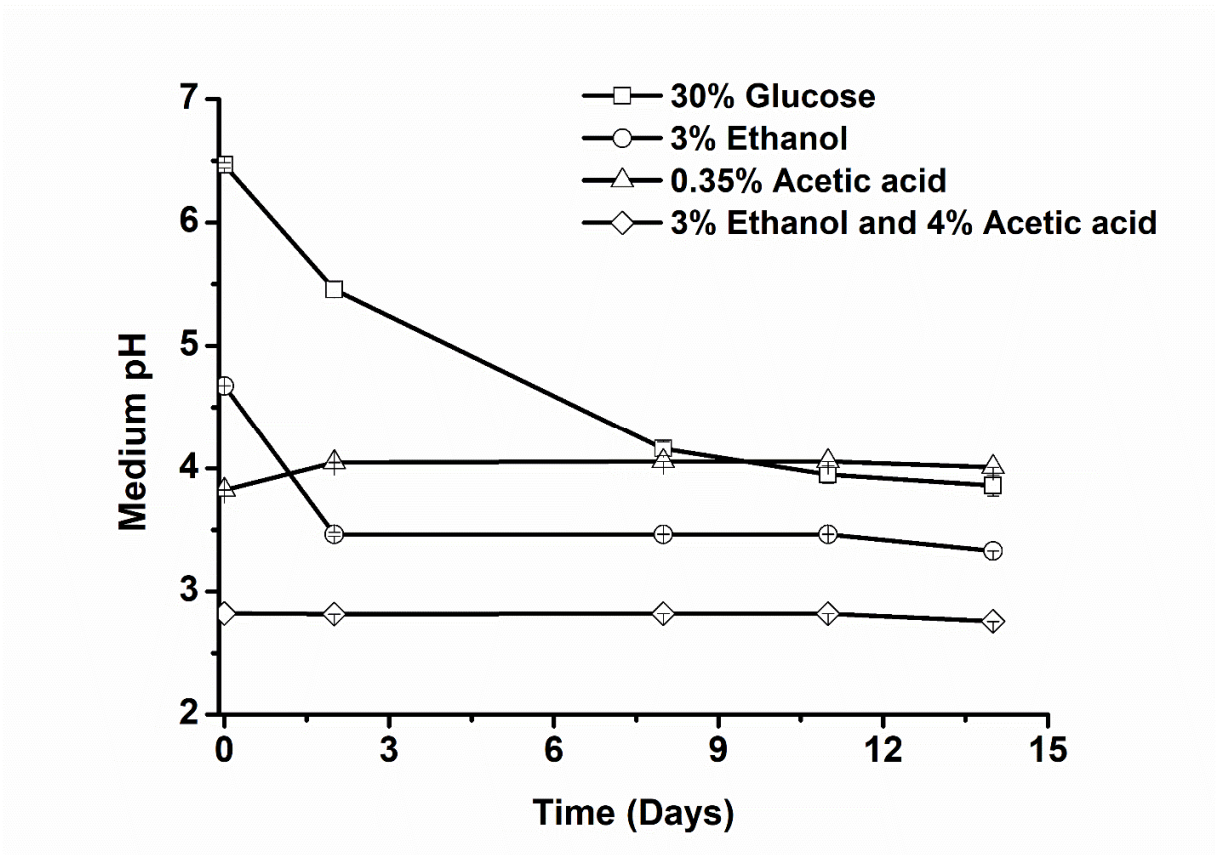

Figure S2: pH changes during cultivations in MA/9 containing 30% glucose and PY medium containing 3% ethanol, 0.35% acetic acid, 3% ethanol and 4% acetic acid. The cultivations were conducted at 30°C and 230 rpm for 14 days. Averaged values and standard deviations from duplicate cultivations are presented. In some cases, the error bars are smaller than the symbol

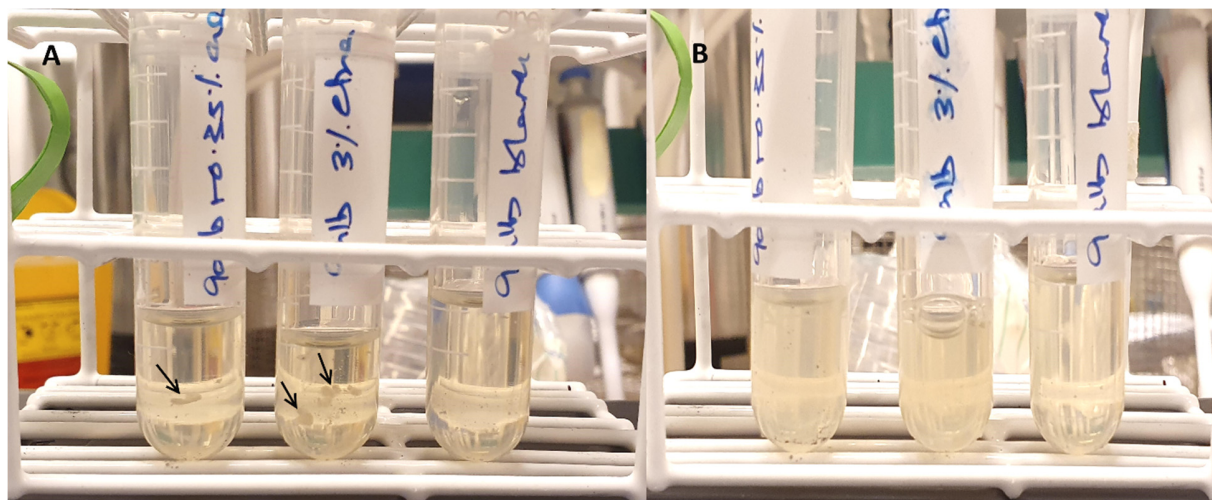

Figure S3. BC pellicle formation in PY medium containing 0.35% acetic acid, 3% ethanol and 4% acetic acid (A). Verification of BC pellicle, produced after 14-day cultivation in PY medium individually containing the above-mentioned carbons sources, were conducted using 1% cellulase. Lysis of BC pellicle and release of cells after the cellulase treatment is shown in B. The images were cropped and brightness and contrast were adjusted to improve clarity.

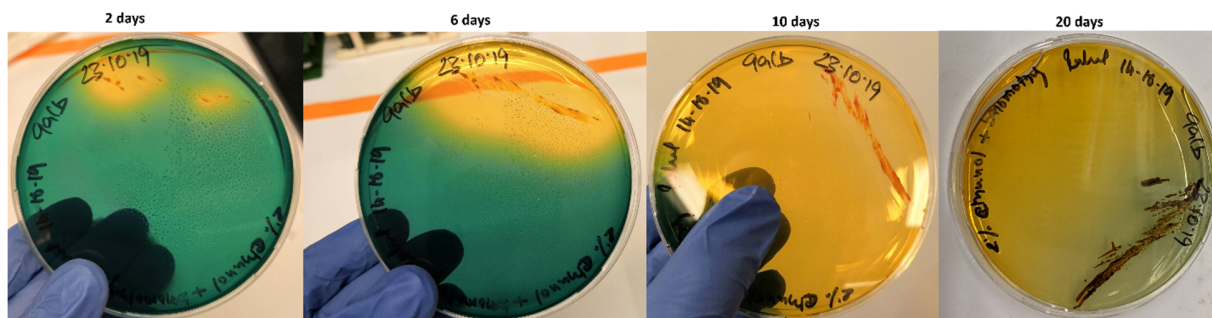

Figure S4: Overoxidation of acetic acid by ENS9B. Single colonies were streaked onto PY medium containing 2% ethanol and 0.0002% bromothymol blue as the pH indicator. Figures (from left to right) shows the acidification (blue to yellow coloration) and neutralization (yellow to blue) of PY agar during 2, 6, 10 and 20 days of incubation at 30°C. The images were cropped and brightness and contrast were adjusted to improve clarity.

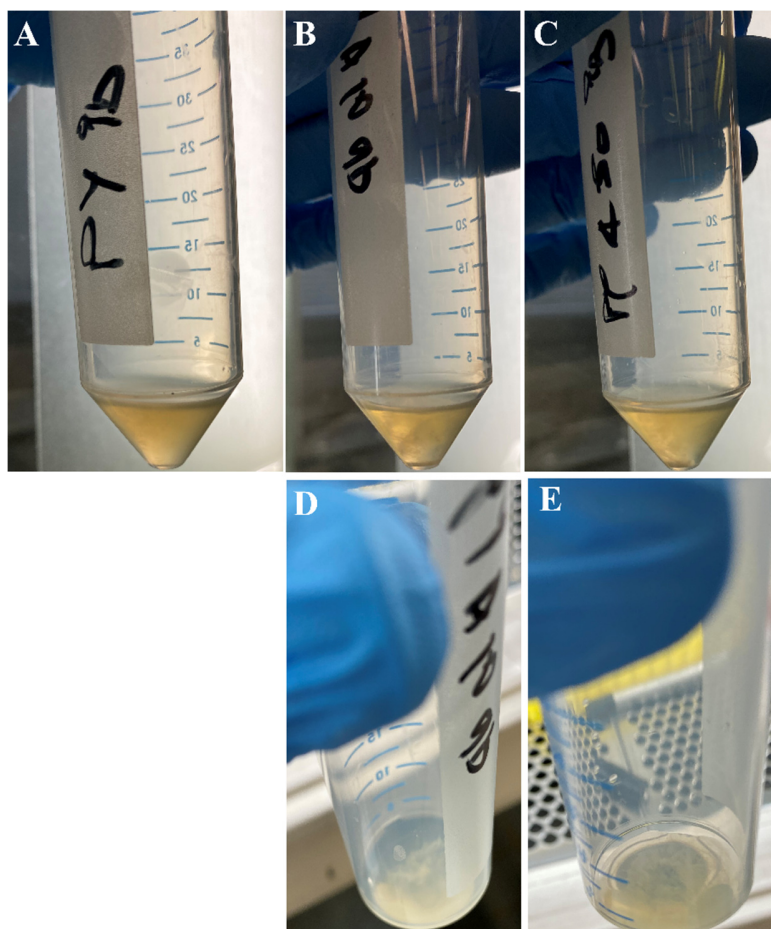

Figure S5: BC pellicle production by *K. rhaeticus* ENS9b cells statically grown in 50-ml tubes containing 10 ml (A) PY substrate control (i.e., devoid of acetate), (B) PY medium supplemented with 10-mM acetate and (C) PY medium supplemented with 50-mM acetate for 14 days at 30°C. (D) and (E) are the top-view images of sub-figures (B) and (C), respectively, showing the cellulose pellicles. The images were cropped and brightness and contrast were adjusted to improve clarity.



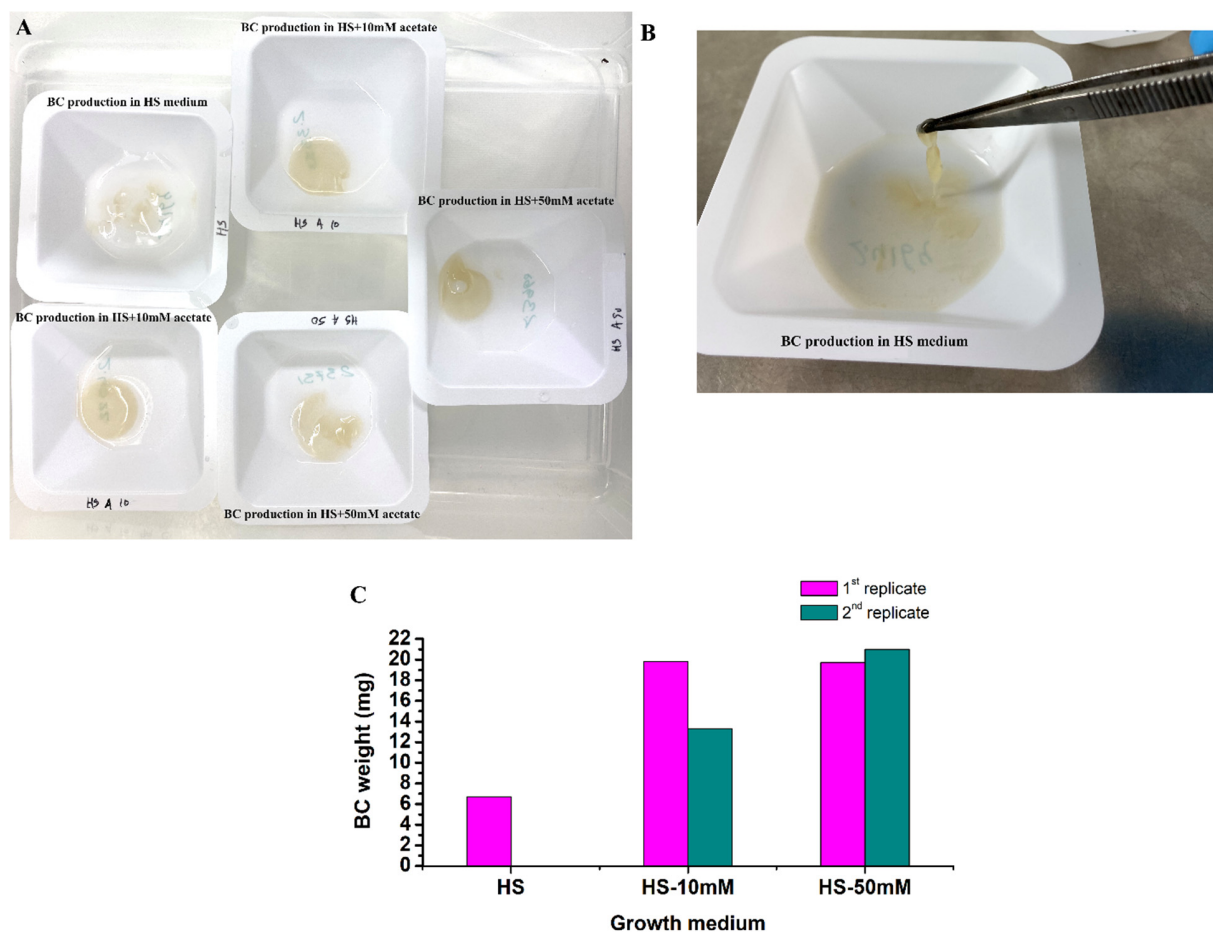

Figure S6. BC production by *K. rhaeticus* ENS9b cells grown statically in HS control (HS, without acetate) and sample (A10 and A50, medium containing 10-mM and 50-mM acetate) cultivation medium. (A) and (B) presents the pristine BC pellicles and the fragile pellicles produced from the control cultivation, respectively, placed on 46 x 46 x 8 mm pre-weighed weighing boats. The images were cropped and brightness and contrast were adjusted to improve clarity. (C) BC pellicle weights produced from HS medium with and without acetate supplementation. The BC pellicles produced from respective cultivations were collected and dried O/N at 60°C. The graph presents the BC weights (in milligrams) obtained from each replicate. The pellicles were not treated with alkali and MQ. Thus, the medium components present in the pellicles may alter the titers and thus, the BC weights are presented.

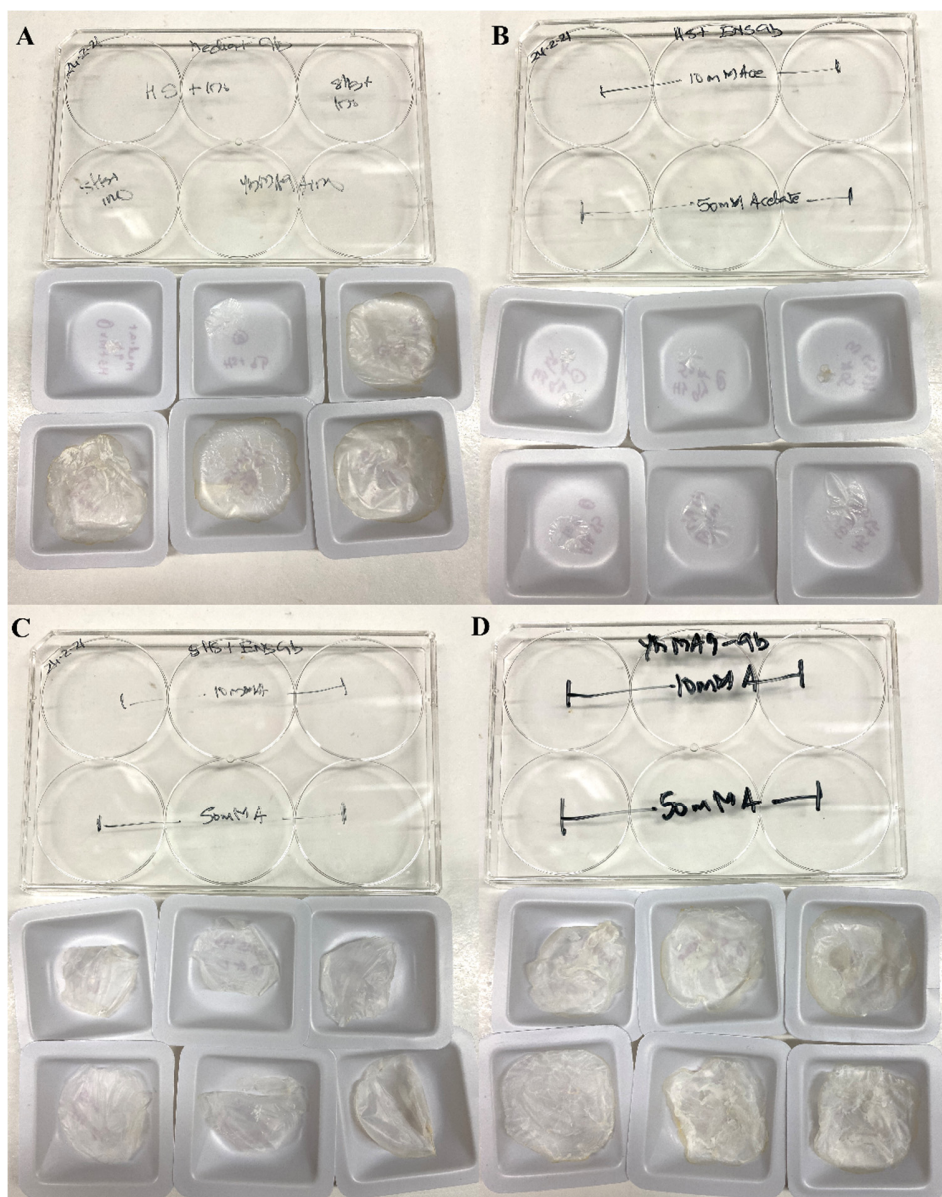

Figure S7. Dried BC sheets. BC pellicles produced by *K. rhaiticus* ENS9b grown statistically in (A) control cultivations devoid of acetate, (B) HS medium, (C) sHS medium and (D) YhMA/9 containing 10-mM and 50-mM acetate. The BC pellicles washed with alkali and ultra-pure water were placed on 46 x 46 x 8 mm pre-weighed weighing boats and dried O/N at 60°C. The images were cropped and brightness and contrast were adjusted to improve clarity.

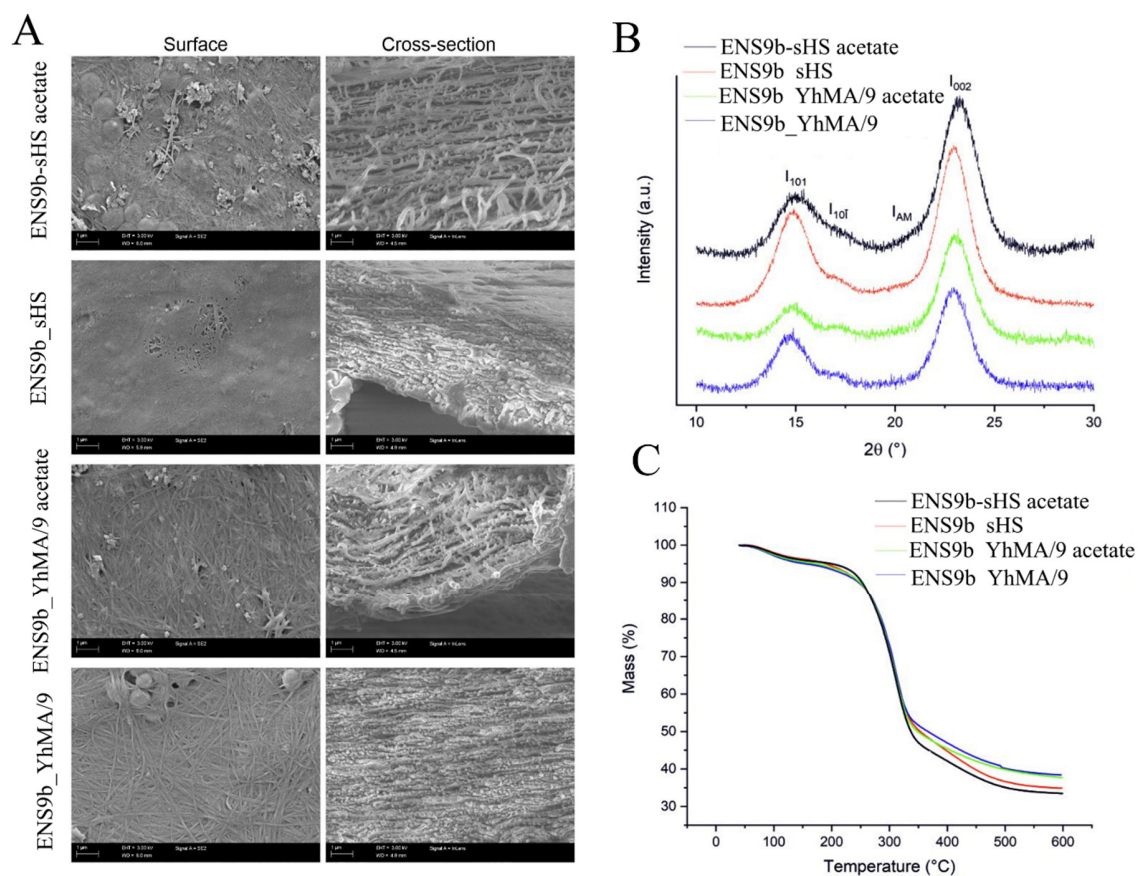

Figure S8. BC film characterization. (A) TGA (B) XRD diffractograms and (C) SEM analysis of BC films synthesized from acetate supplemented sHS, YhMA/9 medium and respective control cultivations devoid of acetate (ENS9b\_YhMA/9 and ENS9b\_sHS).

## Supplementary Table

| Table S1 General genome and assembly statistics of <i>K. rhaeticus</i> ENS9b genome |                                                                                                                                      |
|-------------------------------------------------------------------------------------|--------------------------------------------------------------------------------------------------------------------------------------|
| Attribute                                                                           | Value                                                                                                                                |
| N50 (shortest sequence length at 50% of the genome)                                 | 200461 bp                                                                                                                            |
| L50 (smallest number of contigs comprising of 50% of the genome)                    | 6                                                                                                                                    |
| Contigs unplaced in the genome                                                      | 7 (90 kbp)                                                                                                                           |
| Bowtie2 mapping                                                                     | 94%                                                                                                                                  |
| Chromosome                                                                          | 3645912 bp (GC content, 63.1%)                                                                                                       |
| Origin of replication                                                               | At genomic position 1099952:1100308 bp                                                                                               |
| Number of protein-coding genes                                                      | 3302                                                                                                                                 |
| Number of repeat DNA                                                                | 120                                                                                                                                  |
| Number of rRNA                                                                      | 3                                                                                                                                    |
| Number of tRNA                                                                      | 46                                                                                                                                   |
| Number of gene annotations to KEGG orthology                                        | 1646                                                                                                                                 |
| Predicted plasmids                                                                  | 5 [p9b_1 (18826 bp, GC 59%), p9b_2 (13375 bp, GC 60%), p9b_3 (9758 bp, GC 60%), p9b_4 (3007 bp, GC 66%) and p9b_5 (2295 bp, GC 67%)] |



## Amino acid sequences

*Enzymes involved in carbohydrate uptake and metabolism*

>Carbohydrate-selective porin 1, OprB family (encoding gene at position 1261539:1263020 bp)

MCVVVSFYCNLSWARKPVPDHAARTQSGLLVSQPHAEVRETPAAPHASVSTRLNSIFRTEGLSILLTNR  
EDALRVRDLSAGYYASSEAPGHILPQIGALRSRLQNRGVTFQFTYKGEAMADVGGGISRGMMDYVHELT  
LQTQFDLGRFLGFTGWTVHTLLMERVGREVS HDRVGDYNISLMEVYSLSGHSAHLTDMYAQKSFLH  
NTVDLAFGRMALTHVFATSPLLCSFMMTCSAPVAIKLDAGFSVYPKATWGGRVRLRPTRDTLVQIGAY  
SVSPLNEDISGWAWAGEKSTGLMIPVEFAWQPFPGPRKLPGHYVLGF AHDTRYADNIGDVPAGSAIR  
PHGGEARDTFYLEADQMLYRKGGASQMAGGYVLAGYIHNTPDVSVISDEFYVGSLLGIIPHRPHDRF  
GVMYSYRMSRPTLGGQQLRMDAGMALGVHVNPGQTHAAVLEAYYGVPVYPGILVQPEFQYMMRP  
GETAHIPNAEVVGLKVICTL

>Carbohydrate-selective porin 2, OprB family (encoding gene at position 1287655:1289154 bp)

MCVIKTCANNENKSAIKWNFIPVRIRLLAVAVGMLFIGCTLTSEVLAQTETAKTAFTTHYDPAAFPMT  
MGQVAIGPLVPMLTASPHLFGDWGGIQPWL TNRGIFLNVTVNEEYMGNV TGGRQRANVAAGQVAG  
ALDIDWQRLAGVPSFWTHMLVVNGHGSSLSNAIGDSITNPEEY GARGNVVAHLVDMYADKGFLRDR  
IILSVGVIPTGSFFNQDYLACSF MNVSVCGNPAPSKYVPGGRDWPSGNLGAVLRVRPTLR TYIMGGIFAV  
SPHAYNGGISGWALGQDGLGKLSSQVEIGWSPSFRHLLGHYKIGYWDNSRYPNLYADINGNSFQ  
ATGLPRRYESGMNAAWFLFNQMIHRSGDGLANGLVIGGADYTQGSQVAMRDHEWIGLLQSGTPWG  
RPLDQVGAMFQYMEMGHTVTLQQESSLALGLPYLSNQWGAVYGIQSHENVWEAFYSIHVARGTAFQ  
PDFQYLQRP GATTTFHDAAVIGFQFTTNL

>Carbohydrate-selective porin 3, OprB family (encoding gene at position 1433875:1435551 bp)

MTHSILTKRILAGPSRFVPPFHTPHGSMCRQGLCAASCALGMGLIFSTSGMAQTQIEEDRARLGNSTPLI  
QQIDPANVRDSERAQADVEEKAAGDGDKLDTSGNLLGNMWGARPWLYKHGITFDIQEVDEVWGNG  
TGGSASGNDGAGSGTG PAYDGV TMPTLTIDTEKLFGLKGGLFNVSALQTRGRSISQDHLANFNVPVSG  
FEADRSTRLFELWYQQSFLKGTLDVKIGQQDLDT EFLISDYASLYLNANFGWPMAPSVNLYGGGPSWP  
LASPAIRIRYRPSEKFTFMFAAADNPPGNRYNSTPIQQATGSVSGYNSDPTSQTYDGANGTNFNMGTG  
ALLITELQYALNPQPADMSNVTKNPGLPGVYKLGGYYDTAKFADYRYNRNGGSLGAASVNP DSTESD  
LTPRWDRGNWMVYGIIDQMIWRPSIRSARSVGIFARATGNSGDRNMISFAVDAGINLKAPFRGRDNDT  
LGLGWGIGRASSGQRQFDRDSCSYVQGNENHLELTYQAQVTPWMVMQPDFQYIWHPSGGVADWTG  
LRRVGNEAVFGLHSSITF

>Carbohydrate-selective porin 4, OprB family (encoding gene at position 2853448:2854926 bp)

MKYAIDTRMTRPFPRFLVSLPLFFLALFALCESASAQAIPGEGQGVVGAQPSLVNSRRNVSVNDPGSFF  
SAPYGNQHFFGDWAGLQPFLLKHGVHIEADVHEELAGNFRGGAKQGVTDAGQVGEIDIDWHKLA  
GAPKNFWTHTMIVNGHGRNASTDYIHDSL AGVQQIYGARGNVVAHLVYMYAEQSLFHNRLDISAGW  
IPVGSFFAASPLFCDFMNV SICGNPAPGKYVPGGRDWPSGNLGVMRVMPTVD TYIMASMF AVSPHSY  
NGGISGWSWAQSGLGKFSTPVEIGWLPEFGRNHLAGHYKAGYGYDNSQYNDLYSDINGNSAVLTGQP  
FRKQSGVSTAWFQADQMIMRNGAGPTNGLILLAGYMYTSGKVSAMKDHTWAGIVETGAKWGRPLD

TVGAMFHYYEMSASILQQESSVLAGTPFLNNQWGKVGWGIQTHENVYEVFYNIHTARGMSFQPDFQYI  
NRPGGTTTTYHDAAVMGLQFNCIL

>Carbohydrate-selective porin 5, OprB family (encoding gene at position 3040876:3042462 bp)

MKIPDPPPPRWTALSRLFLSCMLIGPCGATTAAHAQVPRTQIADDRARLGNSTPLIQQIDPATVRDSERA  
QADAQAPPSADALDTSGSLLGNMGGARPWLYRHGISFDLQDVNELWGNATGGSASASDGAGGAGT  
GPAYDGVMTPTLTIDTEKLFGLKGGLFNVSALQTRGRSISQDHLADFNVPVSGFEADRSTRLFELWYQHS  
FLGGKLDVKIGQQDLDEFLISDYGALYLNANFGWPMGPSNLNYAGGPSWPLASPAVRVRYRPDETFT  
FMFAAADDNPPGNSSNSFVIQNGGNRADPTSQTTNDGSGTQFNMGTGALLITELQYALNPQPADMG  
ATRNPGLPGVYKLGYYDTARFPDYRYNMQGRPLGTYGGMPRQDRGNWLLYGIIDQMIWRPSLASPR  
SLGVFARATGNSGDRNMISFAIDAGLNLKAPFRGRNNDTIGLGWIGGRASSGLREYDRTSGALLQGSE  
NHLELTYYAQVTPWMVMQPDFQYVWHPSGRVADWSGLRRVGNEVVCGLHASLTF

>Carbohydrate-selective porin 6, OprB family (encoding gene at position 3439017:3440453 bp)

MSVPGHAQTIPVAARDVWQADEIPASESQDTPSAAGGSLLGDMGGLRPWLARYGMTLGIQDVNELW  
GNATGGIASTSGDGRGAGTGASYIGVTMPDLTADLEKLMGLVGGTFNVSALQIRGRAITQDHLADFN  
ISGFEADRSTRLFELWYQQSFLKDTLDIKIGQQDLDEFLISDYASQYLNASFGWPMGPSANLYAGGPS  
WPLAAPAIRLRYRPGGNYTVMFAASDDNPSGNRDSNVFVGTSNPADPTSQTMNDGSGTQFNMGTGA  
LLITEIQYALNPRSGDRPGAVRHAGLPVYKLGYYDTARFPDYRYNMQGGQSLGAYGGTPRWDRGN  
WLIYGIVDQLIWRPSEGARALGVFVRATGNSGDRNIISFAIDAGLNLKAPFAGRTNDTLGLGWIGRA  
TSGVRAYDRARGALVQGNENHFELTYAQVTPWMVLQPDFQYVLDPSGGLGNPSRPMRRIGNEAVF  
GLHTNVNF

>Carbohydrate-selective porin 7, OprB family (encoding gene at position 3440518:3441825 bp)

MVVFLAVLSPAYAQTVPVSVPSAGVTPRQSVDPHDIPRTRLSGDWGGMRNWLLAQGIDIRISDTDELW  
ANPVGGAQASENYIGSTAVEMVTDLHALTGALGTFDISAMEIRGRPFSNAPLYVFNQTSNIEADDNG  
RLYELWYSQKFLRERLALRIGKLDLGHDFMVSSVGLTFLNASFSWPIMPNDNDLYDQGPVSPVTTPAIRLR  
YTLSPRWNFLFAAADDNPVGGPFINVRDPWNQNRDPGGTRFSFSTGALFFGEVQYRRDISGRQGTYKL  
GGYFDTGRFPDQSDFAKSHKTNWAVYGIVDQTLRHFGRITTLDAFIRGNWTADTDNRNQIVYAVDGGIA  
LSAPFHRRGDVLGLGAGLGAASPCLAADRRSGLPAQGNEYHLELTYYAQVTPWFMLQPDIIQIVSPS  
GGVLDDRGRRVHDEAIFGLHGSVTF

>Aquaporin Z\_1 (encoding gene at position 1386137:1387120 bp)

MKYIEIHGKRRSAYPTCRSTLFPHPPCSFKNIRGLEKGQKAHSPFPSNDNKRIKWANMLKNRQFLGELI  
AECIAVAIIVMIGDSVAAMYALYDPSPYKLAYWGVCIWGLSVTIAIYITGSVSGTHANPAVSVALALYR  
GFPWRKVPAYCAAQILGGVIGAALVYTLYQPVIDHYNQLHALTRADGGAAGVFFTHPGEFITPFHAFV  
DETILTGLLVFGIFAVTCEYNTVAPQANSALIIIGLLVASIGACSGYLEAWAINPARDFGPRLFCFLAGW  
GDSALPGPDHFWVVPVAGPVLGGVLGAGCYQFLIRPFIPRQASPAVPPVS

>Aquaporin Z\_2 (encoding gene at position 1847677:1848606 bp)

MRLPHLHLPYLHVHVHDRPLAGDPPHPNPFHWKLYFCETVATAILMVLGLSGVILLTAPGSPLSPPLL  
HHPYVQTALCGLVFGLSGTAAAMTPFGKVSGAHINPSVTLAFSLAKRIGGVDALNYMIAQVIGAFLLT  
AVVYGLGRLVTWWGSMVAVAVRYGATVPYGRISIWWAMWSEMFVTAALIAMLYWLAHPRWKFITP

WSGGLFFLIMNPFTAWLSGNSVNFARTLAPALFSGQWTGLWVYVVGPFAGASLAVMAIRMNLMGRL  
HLL EARLVNFGHHGRVPGLD DPHRKL NHPDDPDHVPPGTGPA

>Aquaporin Z\_3 (encoding gene at position 3161790:3162686 bp)

MTATRPPGGS AITDRPLAGAPHPDHPLHWKLYGCEMVATMVLMLCGIVSVTLLTTPQTPVGRMLAPH  
PVIQTMLCGLFFGLAGTVAAAYTPFGRVSGAHVSPSVSLAFSLARRLGWVDLCGYVAAQMLGACLA AV  
LLAGVGHVLPVWGKMAQDATAATVPFSGVAVVWPLVTEMVLTCLLVIMLCALAAHPVLKWFTPW  
AGGVFFCLCNPVSAWLSGNSNLARSFGPAVVTGQWDSFWIYALGPFTGAAMAIWLLRSRLLGRIEVE  
EARLVNFGHHGRIPSL LHPGRRMEGGPAKYD

>Quinoprotein glucose dehydrogenase\_1 (encoding gene at position 1924182:1926572 bp)

MNTPLRSAPLLAA AIGVCALAGLYLLGGGLWLCAIGGSFYV VAGALLVTAFLFRRQAVALT VYAA  
LLLGTMAWAVNEAGLDFWALAPRGDILVPIGIVLLL PWVTRHLQPATPGARLPLLGAIGA AVVIGAA  
LMGDPQDIAGSLPPVAQNAPEPGDAHQMPDEDWQAYGRTQFGDRFSPLRQINTGNVSRLKVAWTFR  
TGDMRGPNDPGEITDEVTPIKVRDTLYLCTPHQILFALDARTGKQRWKFD PQLQYNPTFQHLCRGVS  
YHEDRVEAQADGAPAPAPAECARRIFLPTNDGQLFALDAESGARCASFGNNGVVDLRDGMPVRTLG F  
YEPTSPPVVTDTTVIVSGAVTDNYSTHEPSGVTRGFDVHTGALRWAFDPGNPDPNEMPSEHHTFVPNS  
PNSWITSSYDAKLDLIYPMGVQTPDIWGGNRGADAERYASAIVALNATTGRLVWSYQTVH HDLWDM  
DIPAQPSLVDIRNEHGEVIPTLYAPAKTGNIFVLDRRNGQLVVP APEQPVPQGAAPGDHLSPTQPF SRTL  
FRPSQKLTADMWGGTMFDQLVCRIMFHRLRYEGTFTPPSLQGT LVFPGNLGMFEWGGLAVDPERQI  
AIANPIAIPFVSKLIPRGPNNPATPDRSLPSGSESGVQPQFGVPYGV DLHPFLSPLGLPCKQPAWGYMSGI  
DLRTNKIVWKHRNGTIRDSAPLPLPIWMGVPSLGGPLTTAGGVAFLTSTLDYYIRAYDVTTGRVLWQD  
RLPAGGQSTPMTYAVDGRQYIVTADCGHGSFGTKLGDYIVAYTLADQN

>Quinoprotein glucose dehydrogenase\_2 (encoding gene at position 2594170:2596791 bp)

MRQDLPFESHAREIPRNPSGAACLHHA VQTRWPHTGIESIMFPRPIENFRKNAGMREGKQKLF SIITSAL  
LALVGLFLFFGGAQLMVLGGSWFYVLAGCLLLAVAVTGVKAPQLAMRVYAAFLVVATI WALTETGFN  
IWGLEVRLLAPIGFGAWMLLPWVWRSGGNWLADKRDMLGAIGLAVVVLVISCFTSYSIDGTVPDDRM  
AAQQQADPAADGVADADWQAYGR TMGGDRYSPLAQITRGNVSHLKRAWVTRTGDVEQDGE GTVA  
GPDQGHEFNLEVTPLKVGDTLYMCTPHSWVMALDATTGKV KWKFDPHPDTADLAKNVYLACRGVS  
YYRIPDEIQTSCRTRIYSPVADV RIVALDAETGKPCDDFGDHGFISMRAYLGHVPHGFHFITS PPLVAKN  
RLITGGWIFDNQANFEP SGAIRAFDATTGEIAWAWDAGHSPETWKP GPTDVLTRDTPNAWGVYTADP  
ALGMVYIPTGNAPPDNW GGSRRPFDDATSSATIALDIVTGERRWTYQTVH HDLWDM DIPSGPSMVEL  
PGPNGESIPALVQSTKRGEFFVLD RRTGAPVPGYPVEERPVP TAGAAPDDRVSPTQPYPAAMP SLTPPN  
LKESDMWGATLLDQMICRIQYRQSAYEGQFTPPHVGR TTIVYPAFYGVVDWQGITIDPQRKIMLANAS  
YLPFRIKLEKRQGLEGKGVLP RWNGQGE EPAAKGDALSVPDYGTPIYALTNPWL NPLQIPCKGPVWG  
TIT AIDLVTKKIVWQHVPVGTTRDTGPFRT HNNLPLPTGMYNIGGSIVTRGGLVFMGATADDY LRAFDL  
ATGKVIWTDRLPAGGQATPMSYEIGGKQYVLIAAGGHGGLGTRSGDYIIAYTL DGEKGAASAQ

>Glycerol uptake facilitator protein (encoding gene at position 1285133:1285972 bp)

MNRVFLGELISEALAVFIIIAFGDSVAAMYLLYDPSPYLHAYWGVCIWGLGVTVAIYATGSVSGTHAN  
PAVTLALATYRAFPWKKVIPYWFAQIVGGFLGAALVYALYYPVIDHFNDMHQLARMSGGGAGVFFTA

PAPGITLWHAFSDEIILTAILVFGIFAITEQYNEMAPGANFGALIIGFLVAAIGASMGYLEAWAINPARDL  
GPRLFAYVAGWHEAALPAAGHYWLVVPVAGPLIGLLGATAYEYLIYPFLPAQLRARQALQGKIAEETII  
IGE

>Glycerol kinase\_1 (encoding gene at position 1286008:1287507 bp)

MTDYVGAIDQGTSSRFMIFDRKGTIVSVAQKEHRQIYPRPGWVEHDPHIEILENTNEMIGAAMARANL  
GAASLVSVGITNQRETAVLWDRRTGLPLHNAIVWQDTRVDQLVSEYGRDGGQDRFRAITGLPLASYFA  
GLKLRWLLDNVEGARQKAESGQALFGTVDSWLSWNLTGGTRGGIHITDVTNASRTQLMNLKTCAWD  
EDMLAAFSIPAACLPRIVPSSQVYGTITIPSLQGTKLAGILGDQQAALVGQTCFSPGEAKNTYGTGSFLL  
MNTGTDPVQSKAGLLTTVAYQFGTEEPYALEGSIITGALVQWLRDNLKLFDLATQIEPLARSVADN  
GGVYIVPAFSGLYAPYWKENARGVIVGLTRYVTRAHFARATLEATAYQVRDVVAAMEEDSGIVLRSLK  
TDGGMVANELLMQFQADILNVPVVRPKVVETTALGAAYAAGLAVGYWKNIDDLRANWEVDRTWQ  
PTMPPEQRARYLAWWKKAVQKSFDWAE

>Glycerol kinase\_2 (encoding gene at position 1389048:13890547 bp)

MNKKNRILAIQGTSTRSIVFDRDIAALSVARVEFAQHYPNQGWVEHDAEEIWSNVLSTAREAIKV  
GGPATIAGIGITNQRETIVVWDRKTGSPVHRAIVWQDRRTTPVCMRMHEQGYEPLVRERTGLLLDPYFS  
ATKIAWILDNVEGARARAERGELACGTIDSFLLWRLTGGRVHATDTTNASRTLLFNIHTCAWDDELLA  
LFNVPRAILPEVRTNSEIFGETEADLFGEPLKVAGMAGDQNAAMVGCACFKPGTAKATYGTGCFALL  
NTGTTTPVNSENRMLTTIAYRIGDETVYALEGSIFVAGAAIRWLRDGLGLITHASQTDDMATRVPHSHGV  
YMVPGFVGLGAPHWDPDARGLICGMTLGSTAAHIARAALSVAYQTLDLMEAMREDGGGKLNALRV  
DGGMSVNDWFCQFLADMLQTPVERPRQVETALGA AFLAGLATGVWSSIPELEGTWTRGHLFRPTMD  
KAQRDSMVAGWHLAVRRTLSTVAA

>Glycerol dehydrogenase\_1 (encoding gene at position 1201435:1203437 bp)

MRRYRFLAMGMAAAWLCLPVSSHAQFAAAGSGGPPGASIPGPGRADPAEQTPADPGYFAGPSPYAP  
QAPGVNAANLPDIGSVAADSLPAMLPQAGAAPAPGDWATYGRDDAQTRYSPLAQITPENVS HLQVA  
FTYHTGSYPRPGQTNKWAAETTPIKVGDGLYMCSAQNDIMKLDPATGKEIWRRNLGEKEYEAIPTAAC  
KGVTYFTSSQVPQGQPCHNRILEGTLDMLVAVDAATGEFCPGFGHGGQVNLMMQGMGESVPGFVAM  
TVPPTVVNGVVVVNHQVLDGQRRWAPSGVVRGYDAESGRFVWAWDVKHPDDHDQPTGNRHYSRG  
TPNSWAAMTGDDALGLVYVPTGNAAGDYFSGYRSAAENAVSTSIVALDVRTGSPRWVFQTVHKDVW  
DYDMGSQVTMMDMPGTDGQTVPAIIVPTKRGQTFVLDRTGQSILPVEERPAPAGDVAGDTRAPTQP  
WSVGMPSLHMPDLREQDMWGMSPIDQLYCRIFRRAHYVGEFTPPSLDRPWIMYPGNNGGSDWGSM  
AYDPQTGILMMLREYGGKPLVEWLVL LLGVVIFLVGLVFVAGGAELALLGGS LYLLCGLVLLASGTA  
MLMGRTLGALLYLAALAYTWAWSVWEVGFSPVDLLPRAFGPTLLGLPVLF SIPVLRRMATRRAIGGIC

> Glycerol dehydrogenase\_2 (encoding gene at position 1673449:1676036 bp)

MSRTPMPRGLLLGATIITGLSCATALAQVPPADQPPGTGNATVPPAQPTPPADAFSAPSPNGPQAPGV  
NAANIPDGPPAEPSEATPMVEQVVANPAHDDWPGYARDDRATRYSPLDQITPANISHLKRAFIYHTGS  
KPGPGQV NKWAAETTPIKVGDGM MYMCSALNDMMRIDPATGKEVWHFHANEKYESIPYTAACKAVV  
YYTSSTVPEGEHCHHRILEATLDERLIEVDSEDGKVCEGFGWHGMVNLMMKGMGESVPGFVAETAPPI  
VNGAIITNQEILDGQRRWAPSGVIRGYDAETGRFLWAWDVNRPHEHGEPKEGEHYSRGTPNSWAAMI



GDNALGLVYVPTGNSAADYYSAMRSPEENKVSSAVVAIDVKTGEPRWVFQTVHKDVWDYDIGSQPTL  
MDFTKPDGSSVPALIMPTKRGQTFVLDRRTGEPVLPVEERPAPSPGMVPGDPRAPTQPWSVGMPRLGF  
APLKEADMWGMSPIDQLYCRLKYRRAHYVGEFTPPSIDKPWLEYPGYNGGSDWGSVAYDEKTGILIAN  
WNNTPMYDQLVSRKKADQLGLMPVDDPNYKPGGGGAEGAGAMAETPYGIVVSPFWDEYTGMMCN  
RPPYGMITAIDMHTQKVLWQHPLGSARANGPFGLPHTLPLTIGTPNNGGPVITAGGLIFVAATTDNMI  
HAFDIHTGREVWNDVLPGGGQATPMTYEYKKGQYVAIMAGGHHFMMTPVTDDL VVYALDNVNMS  
AFVTPQTPAGWATLGLAVIILLGLPLLYMGAELAFIGGSWYYVIVGLAVTVAGLLMAMGRVAGGLLY  
LAAVAFTWLWALWEVGDLGWGLLPRVFGPTLLALGVLACLPVLKRAEAARSTLVREVA

>Dihydroxyacetone kinase (encoding gene at position 1848749:1850380 bp)

MKRFFNTRETIVTEALDGFLRSAAGQHLCRLDGYPDTCVIMQREPERGLVSVISGGGSGHEPAHAGFVG  
RGMLTAAVCGALFASPCVDAIVAAILATTGEAGCLLVKNYTGDRLNFGLA AERARALGKQVEMVIV  
GDDIALPDSATPRGVAGTVLAHKL AGYGAAQGWPLTRVAQFVRDGAGRMRTIGMALED CNPYEPGR  
ASRLAADEAEGLGLIHGEPGAQRIALASASDLMRRVTETLEASLPATVRNTRFAVVLNNLGCVPEVEM  
ALLLEAFSHTRLARRVSHVIGPAPLMTALDMNGFSLTIELDESITHALQAPAQPPAWPGMVPLGSPAV  
APMPVMPDAFPYPASTDPTVRAMLEHGAKVLIANEAPLNELDGKIGDGDAGSTFAGAAREITAALDR  
LPMADPHQLMTTVSNILTQHAGGSSGVLF AIMFSAAGRSRAPWREALREGLEHMMACGGAKPGDRT  
MIDALYPAL EALARTGSLTDAALAARKGADATTTMETARAGRAAYVPSAHVRNVDPGAEAVARLL  
EGLARG

>Triosephosphate isomerase (encoding gene at position 2116868:2117611 bp)

MKQIIVGNWKMNGLSADADALVDALATGLAALPARADVVCPPFTQLARLAPKLKAAGMALGAQD  
CHKDRSGAHTGDISAPMLVDLGV EYVILGHSEERRAEHGELDET VREKAVAAMAAGLTPIVCVGENAD  
QRDSGDSQEKVGVWQIQGSLPQGFTGIVAYEPVWAIGTGQAASQQDIADMSAFIRAELVRQFGEAGKTI  
RILYGGSVNERNVTDILPVENV DGALVGNASLKADAFVPLVRAARAS

*Enzymes involved in BC biogenesis*

>bcsA1 (encoding gene at position 666919:669156 bp)

MSEVQSSAPAESWFDRLSNKILSLRGASYIVGAIGLCALLAATTVTLSVNEQLIVALVCVVVFFIVGRRKS  
RRTQIFLEVL SALVSLRYLTWRLTETLDFDTWLQGT LGVTLLLAELYALYMLFLSYFQTISPLHRAPLPLSP  
NPEDWPTVDIFIPTYDESLGIVRLTVLGALGIDWPPDKVNVYILDDGKREEFARFAEECGARYIARPDNA  
HAKAGNLNYAIQHTSGEYILILDCDHIPTRAFLQISMGWMVEDKKIALMQTPHHFYSPDPFQRNLAVG  
YRTPPEGNLFGYVIQDGND FWDATFFCGSCAILRRKAIEEINGFATETVTE DAHTALRMQRRGWSTAYL  
RIPLASGLATERLVTHIGQRMRWARGMFQIFRVDNPM LGPGLKLGQRLCYLSAMTSFFFAIPRVIFLASP  
LAFLFFSQNIIAASPLAVLAYAIPHMFH SVATAAKVNKGWRYSFWS EVYETVMALFLVRVTIVTMMFPS  
KGKFNVTEKGGVLENEEFDLGATYPNIIFAVIMAIGLMRGLFALAFQHLDIISERAYALNCVWSVISLIIL  
LAAIAVGRETKQIRHSHRVDARIPVTYDYEGNSSHGITQDVSMGGVAIHMPWRNVTPDQP VQTVVH  
AVLDGEVVNL PATMIRCANGKAVFTWNITSLPIEASVVRVFGRADVWLQWNDYEHDRPLRSLWSLIL  
SIKALFRKKGRMMIHSRPQNKPIALPVERREPTSSQGGQKQEGKISRAAS

>bcsB1 (encoding gene at position 669157:671572 bp)

MRPRDMKMVSLIALLVFATGAQAAPVASKAPAPQPAGDNLPLPAAAPAAAAAPAGQQPAGAASA  
APAVDPAAASAADAMVDNAENATGVGSDVATVHTYSLRELGAENALTMRGAAPLQGLQFGIPGDQ  
LVTSARLVVSGAMSPNLQPDNSAVTITLNEQYIGTLRPDP SHPAFGPLSFDINPIFFVSGNRLNFNFSAGS  
KGCTDPSNGLQWASVSEHSELQITTIPLPPRRQLSRLPQPFFDKNVRQKTVIPFVLAQTFDAEVLKASGIL  
ASWFGQQTDFRGVNFPVFSTIPQTGNVAVVGVADELPSALGRPAISGPTLMEVANPSPDPNGTILLVTGR  
DRDEVITASKGIGFSSSTLPVAARMDVAPIDVAPRAPNDAPSFIPTSRPVRLGELVPVSALQGEGYTPGVL  
SVAFR TAPDLYTWRDRPYKLNVRFRAPDGPVLDLARSHLDVGINNTYLQSYSLHEKDSVVDQLVQRFG  
GRGQTSQVQQHTLTIPPWMVFGQDQLQFYFDAAPLTQPGCRPGPSLIHMSVDPDSTIDLSNAYHITRM  
PNLAYMASAGYPFTTYADLSHSAVVLDPHNPNGTVVSAYLDLMGFMGATTWYPVSGLDIVSADHVND  
VADRNLIVLSTLANSGEVSSLLSNSSYQIADGRLHMGMRSTLSGVWNIFQDPMAAINNTHTPTVEVETLS  
GGVGAMVEAESPLASGRTVLALLSADGQGLDNLVQILGQRKNQAKIQGDLVLAHGDDLTYSRSSPLYT  
VGTLPMPWMPDWYMHNPVRVIVVGLFGCLLVAVLVRALLRHALLFRRRQLQEERQKS

> bcsC1 (encoding gene at position 671575:675549 bp)

MNRRYVFSLSAGLLASSCMTVLVAVPLARAQQA STAMTGTQASGGSAA PRQILLQQARFWLQQQQY  
DNARQALQNAQRVAPDAPDVLEVQGEYQTAIGNREAAADTLRHLQQVAPGSTAANSLDLLHERSIS  
TSDLSQVRSLAASGHNAQAVQGYQKLFNGGKPPHSLAVEYYQTMAGVPAEWDQARAGLAGIVASN  
QDYHAQLAFAQALTYNTATRMEGLARLKD LQGFRSQAPVEAAAASQSYRQTL SWLPVTPTTQPLMQ  
QWLD SHPNDELREH MVHPPGGPPDKAGLARQAGYQQLNAGRIAAAEQSFQSALQINSHDADSLGG  
MGLVSMRQGDAAEARRYFQEAMAADPKTADRWRPALAGMEISGDYAAVRQLIAAHQYDAAKQRLS  
ALARQSGQFTGATLMLADLQRTTGQMGA AEQEYQSVLARDPNSQLALMGLARVEMAQGKTAEARQ  
LLSRVGSQYATQVGEIEVTGLMAAASQTS DSARKVSILREAMAQAPRDPWVRINLANALQQQGDMAE  
ANRVMQPILSNPVTAQDRQAGILFTY GSGNDAMTRRLLAGLSPEDYS PAIHAIATEMEIKQDLASRLSM  
VANPVPLIREALSPPDPTGARGVAVADLFRQRGDMIHARMALRIASTRTLDLSADQRLAYATEYMKIS  
NPVAAARLLAPLGDGSGTGAGNALLPEQVQTLQQLRMGIAVAQSDLLNQRGDQAQAYDHLAPALQ  
ADPEATSPKLALARLYNGQGKSGKALEIDLAVLRHNPQDL DARQAAVQAAVN SGRKSLATRLAMDG  
VQESPM DARAWLAMAVADQADGHGHRTISDLRRAYDLRLQQVEGTRAVASGTGEQESLEPPSSNPFR  
HHGYGRQTEL GAPVTGGSYSMEATSPEASDQMLSSIAGQITTLREN LAPSIDGGLGFRSRSGEHGMGRL  
TEANIPIVGRLPLQAGESSLTFSITPTMIW SGQLNTG SVYDVPRFGTDMATQAYNQYVSYISQNNSSSTL  
HSELVKGGEAEAGFAPDVQFGNSWVRADLGASPIGF PITNVLGGVEFS PRVGPVTFRVSAERRSITNSVL  
SYGGMRDPNYNTTLGRYARQLYGKELSSQWSEEWGGVVTNHFHGQVEATLGNTIVYGGGGYAIQTG  
KHVQRNDEREAGIGVNTLVWHNANMLVRIGVSLTYFGYANNQDFYTYGQGGYFSPQSYAAATVPIRY  
AGQHKRLDWDVTGSGYQVFHEHSSPFFPTSSLLQSGAQYIADSYVQNATSSDYLSQETVNSAAYPGDS  
IASLTGGFNARVGYRFTHNLRDL SGRWQKAGNWTESGAMISAHYLIMDQ

> bcsD (encoding gene at position 675549:676019 bp)

MTTFNAKPDFSLFLQALSWEIDDQAGIEVRNDLLREVGHGMAGRLQPPLCNTIHQLQIELNSLLAMIN  
WGYVQLELLPEDHAMRIVHEDLPQVG SAGEPAGTWLAPVLEGLYGRWITSQPGAFGDYVVT RDVD AE  
DLNSVPSQTHILYMRTRSSN

> bcsZ (encoding gene at position 664722:665759 bp)

MGRRSFLSVMAAAGSIPFLSTALAADDPAINAQWAIKRAKYFHPDGRIIDTGNSESHSEGGYGMFLFA  
ATAGDQATFEAMWSWTRANLQHKTDALEFSWRYLDGHNPPVADKNNATDGDLLIALGLVRAGRLW  
KRADYIQDAIAIYGDVLKMLTLQVGPYLVLLPGGVGFATKDSVTNLNLSYYVMPSLMQAFALTGDARW  
QKVMGDGLIINQGRFGEWKLPDWLSINRQNGHFSIANGWPPRFSDAIRVPLYLYWAHMLSPDLLA  
DFTRFWNHFGASALPGWIDLNGARSPYNAPPGYLAVATCSGLSSAGGLPTLTKAPDYSAALTLVYI  
ARGECCGM

>ccpAx (encoding gene at position 665756:666736 bp)

MTTPNKESTEATPRPVVMDNPQDVTRMLSSGYGLSGEGFHYHSFTRPVMLDMTPELPHDSVDDTEH  
HLDDNVTEHESAPATAPVFVFDAPEPAAPPVVAEAPPPPPPPPEPAPPEPPAPPPYTPVVTHVPPP  
PPVEETPVPEPVAEAAAPARPRVPPAQPAPDMASTGGRERRGLQPFAAPRAPSEPPVSSRAAAPATPF  
VQADDWAPVPAQQRGQRPTGPGFFFAKGNDRVATARLFQPVAVARPAKPSKVTMTKFDKTA  
QNAPTGRRPAPSDNSPTLTEVFMTLGGRTDRLVPKPSLRDALLRKREEETGQS

>bglX (encoding gene at position 676251:672452 bp)

MKPSRKSFLLSAVAWGLVAALPAHARHAATAGDPADDQARQVLAHMSLQDKMALLFSVDGGGFNG  
SVAPPGGLGSAAYLRAPAGSGLPDLQISDAGLGVRNPAHIRPNGAAVSLPSGLATASTWDVDMARQA  
GEMIGREAWLSGFNILLGGGADLTRDPRGGRNFEYAGEDPLQTGRMVGSTIAGIQSQHVISTLKHYAM  
NDLETSRMTMSADIDPVAMRESDLLGFEIAIETGHPGSVMCSYNRVNDLYACENPYLLNTTLKQDWH  
YPGFVMSDWGATHSSARAALAGLDQESAGDHADARPYFTALLAADVKAGRVPVARIDDMAQRIVRS  
LFAAGLVAHPPQRGPLDVVTDTLVAQRDEEEGAVLLRNEGGILPLSPTARIAVIGGHADAGVISGGSS  
QVDPIGGEAVKGPCKEWPDPVYFPSSPLKAMRAEAPNAHITYESGTNIAAAVRAARAADVAVVYA  
TQFTFEGMDAPSMHLDANADALITAVAAANPRTVVVMETGDPVLMWPNSSVAGVLEAWFPGSGGG  
PAIARLLFGKVAPSGHLTMTFPQAESQLAHPDIAAGVTADNVFEMQFKTDQELVYDEGSDVGYRWFD  
NHLKPLYPFYGLTYTTFSTDGLAVHRHDAVTVTFTVHNTGNRPGVDVPQVYVGLPDGGARRLAG  
WQRVSLAPGESRAVTVQLDPRLLAHFDGKKDRWSIPSGTFRLWLGTSAATDDSQASLHLSGRTFAP

>bglX2 (encoding gene at position 522700:524739 bp)

MKYASRLRYGLSALRCLIALCMGGLVLSALPVQARAAAGGSAGSAHAADMAARMQPAEQQAVLQAR  
PIGGGEGATQAAADGLLAWPGVARLGLPALRMPDFSSPARPADEGGHPMLPWLALAAATWDPDLARR  
AGGARARAEWEQGRAVVRVGGIDLLPSGRLQAGEDQVLAGTMAGMIGAGLLSGHVLPVFGSVAGDE  
QARADGAVPGRTPAPVPAAWLADGSLLGVAMALEVAHGGALLCGGLAVCQTVTGLGAMVHDAWH  
FPGMVMAATPGGLGPAPDDASLLPGALGTGVDMEQVSSREGGHDMFGAPLRQAVRDGAVRPAQLQ  
AMGMHVLASFYMAGSLDHPPAFTPAHAAAAPPVADTLVSDVEAEGAVLLQENNRVLPFDPALGPVL  
VLVRAPMRHAADLLADELRHAGLGVSVVVAADGANAPGTLPPATAQAARTLVLSGTDADNRMISTL  
ADLGGHVVVVLTGDDPDRQMPWLDMDVSVVQAWAWRDAHARPLAALLSGQQEFSGLHPVTLTGG  
FYPPGMVDADYRAFERAHVAPLFPFGYGLSARGHLTSLDLHVVRREGTHLNASFSVTNPDGTAVRAIPQ  
LYVSPSSDQAAPRRLAAWRSIMVAPGHTLRLTLPVSLRLLAQWNAANWAVAAGDYAFSLGFSSVM  
LVRHADVRLPAMHLPAALDMAAD

>bcsAB2 (encoding gene at position 1020008:1024567 bp)

MAQFVDKITRFMEQAATGRVPSWVPVIGVVMMSFVGSVALLPDMQGLISIGTVLLLLVLNRFKGRGITI  
FLMMLSLVSMRYVWRLTSTIEFHGWIQSALSILLLLAEVYALSTLCLSYFQMAWPLGRKEHPLPEDTS  
SWPHVDIYVPSYNEELSLVRSTVLGALKLDWPEDKLHVYILDDGRRVAFRDFALEAGAGYIIRSQNNHA  
KAGNLNHALKITDGQFAVIFDCDHVPTRGFLKRTIGWMIADPKLALLQTPHHFYAPDPFQRNLVAGA  
HVPPEGNMFYGLVQDGNDFWDATFFCGSCAVIRRSVVLGIGGFATETVTEDAHTALKMQRRGWRTA  
YLREPLAGGLATERLILHIGQVRVWARGMLQIMRVDNPLLGRGLRWEQRLCYLSAMSHFLFAIPRVTF  
VSPLAYLFLGQNIIAASPLAISVYALPHIFHSILTLSRIESRWRYSFWSSEIYETSLALFLVRITIVTLLQPHKGT  
FNVTDKGGLLEKSYFDVGAVYPNVILAVILFAAFLRGIFIVWQFHDRLALQSFALNTLWVVISLIIVLAS  
IAVGRETRQTRAAPRIAVALPVRITDMEGRSFAGHTRDISLGGGLGVDLHWPADVARPDRVMMMEYVNE  
RDGIHATVPATVLALDERSMRLQWERRDLEDESQIVDMVFGRNDWANWADFEPDRPLRSIAMVLR  
IGGLFKWQAREIPRHVADDEEAKAPVVEAKLEKQSLVLKPVRRSARNGAAASAVLLVALAALSPVAM  
AQVQPAASASVPDQGTGVSATPFGDSNTGTVPDMIPVIDQAAADRISDSEVTRTSLFRNLGATSGPLTLR  
GYSPLQGLDVIVPANRVVTHARLSISGALSPSLLPEASAVTVTLNEQYIGTIKVDPEHPQFGPLTFDIDPLY  
FTGDNKLNFRFAGEYRRDCNDLFNEILWARISDMSQITLTTVRIAPERKLSRLPAPFFDPNLRSTLRVPV  
LPDTNSKSSLKAAGLVASWFGKIADFRKLSFPVFTAIPASGNAVEVGENLPVDETGTRPRGPMLAEIAN  
PNDRWGTLVVTGRNAQEVEAAARSLVFSADTLGGVAAKVDDVSLEARQPYDAPAFVPTDRLVRFG  
ELVGAADLQGGGFTPAGMTLPFHLPPDLTYWRGRPFMLDMWIRAPGGPVVDLETSRVDVSLNNNYL  
QSYTLSPPLWQRWSQRLVNLHAGAVGHHTALPTWLLFGQNQLLFNFDARPIDRGACRRTPGDIRMS  
VDSSTLDFRRGYHFAELPNLSYFAEAAFPFSRMADLSETTVVLP SHVDAGTAGAFDLMGFFGASTW  
YPAAGVQIMTADQVGAAQPGGDIVVLGTAEQLGSATSLLSRSPYVIRDGRIQVGEHMGQLQGIWYLFQD  
RDHAGLKNGVTARLNAPIVEAGLMLAAQSPYDHARSVVAFGTGTPERIHDVLVSLRNKTDLP SLQGD  
VIKNGNQFTSYRTAPTYTVGSLPLWVRADWYLSHHPALALYTLGLAGAALTALGVWGWLRRLSRRRIE  
NEELAGEQ

>bcsC2 (encoding gene at position 1026603:1030553 bp)

MTRQYCPARGRQPAVAWRKAPAAWVMRPAACRPSSAWLAGGGWKIICGMVAGVIMAGEIAQAEP  
WTAGPDSAASPAGGSTQITVTPDAGQNAANAHLAHAAAVLELLLNQGYWLGQHNLPKARETIQR  
ALSIEPDNNEALFLLGRLQMAEGQTKLAAATLGRLIQNGNAPGLVADLRAQIHAGPIDPRGLAEARAL  
AAEGKMMMPAMFKYRALFKNGDPPDLAMEYYRVLGATTLG YQEAATRLAAWVARNPRDLDAKLSL  
DRILTYHVTSRDEGLEGLRQLARSNASAAIRDGAIAAWRDALLWEPVTGPTIALYNEWLDLHPGDAEII  
DRRHKAQDAQNIIDGANYRQQGFVLLSRRNIEGAADLFHRLALAINAHDADSLGGMALVAQARQQPA  
LARHYFQQAIQADPDSA AHWRAALKAMEAGGGGGMDPLVARI IQAINSGHYDAAQSDLALLGRRG  
NTITLQALQGMLARRQGHMEEAERLYREILRRAPGNADALFN LGGILIETGREAEAQDIIARLAHIRPD  
LARHLEVAGLSARSDRTRNNDKLSLLNRAMAMAPTDPWIRLKLARALDEAGNHAQAQAIMDGVTS  
GRAVTPDDLQAAILYAMGRHDMARAEQLLARLPPGIESPGMARVAEQIELVRRIQELNRVPRAPNALL  
VALADRPDPTGERGMRIANALLDRHAPQDAQQVLATEERLTQPPQPSQLLAYAGVYLR LHSAVDATR  
CLNAFDAMARARPTDITADQQEIRNQIAIGLAIMTADGFNRYGQTARAYQVLAPVLQAH PDSAEHL  
AMGRVYQTRNMARRALEEDQIALRLKPHNIYALAAARDAGGLHQMAEAKDYSTRLAHEDPDGPM  
SWEVRSDIERIEGNTRAQLVDVEHARHAQCTLDGEGTCDGQHESFLPDYRWPEIDSNYINLHGATLPA  
TYHYIPEDDGPEAMDRQIVYLRDSVSPQIDANSYVRSRTGTAGLQQLTEFAVPITGTL PFESWEHRLSFSI  
VPTLLFTGNPLANPYSAHEFGTYAINGALPGSSHYYTQGVGLSLNYVNHWF SADVGSSPLGFPITNVV  
GGVEFAPRLTRNLGLRISGGRRMVTDS ELSYAGMRDPGTGRLWGGVTRMFGHGALEWSEPTWNLYA



GGGFAYLGGTHVVDNTEVEAGAGGSATVWQSHDRQWLRVGLDLMYFGYKRDTYSFTWGQGGYFSP  
QQYYGAMIPVEWSGHDRRWTWFLRGEAGFQHYHSNGAPYYPTDSALQALSVAHQPDDYYGDEGESGL  
AGNIRGRVVYQFTHRLRLGMEGGYSRAGNWSETSGMWMAHYTFDGQ

>bcsAB3 (encoding gene at position 2139998:2144443 bp)

MIWRILKSPFVTGPLFALLMAVVSITYLTPDHQFFVAVGGGVLFLLVRRHDERWSRCFLMVLSIVVSGR  
YLWVRFSTLDDLQSLVLALAVGEIYTTIRVGFTYFQLAWPLRRQIHPLPEDEGTWPVIDVYVPTY  
NEDISIVRTTVLGCLSMDWPADRLNVYILDDGRRRAFRDFAGQVGAGYINRAENVHAKAGNLNHAIG  
VTSGDIIAIFDCDHVPVRGFLKKTVGWMLADPNLALLQTPHHFYSPDPFRRNMSRGMQVPPESNLFY  
LLQDGNDFWNATFFCGSCALLRRRAIVSINGFATETVTEAHTALRMQRKGWGTGYLREPLAAGLETE  
TLLLQIQQRVRWARGMFQMLRIDNPMLGRGLRLTQRICYMAAAATNYFFAIPRMMFLLAPLAYLFLGVT  
MIAASPYELAVYALPHLFHTTMTMSRLQGRWRYSEIYESMLAPFLVRMTFVTMIAPHKGSFNVT  
KGGLLDRERFDWRASYPGVIVAVVLA VGLVSGIWAIVHYHETLVFRAMAVNSIWWLFSLIIVLGGVA  
AARETRQRRHSHRVAASLPFELVDAQGQVHACRSVDVSMGGCQLDAATVPGAAGGRVMLRWSLPS  
GPATMGATIIARCGRLHLQWVIAGLASERQVVALVFGRDDAWARWSDFPDRPLRSYLLVASICAL  
FRPPPRVRDETPHAVARKTAAQDETLPQQVLVIPPDRTVVLRDIGTALVLAAMLLLPAMDARAQAAP  
AMADAGPAVVADGSVDAIDNAHMTSADVDEVSHQPVTRTRTLADMGRTEDMVLARANAPLHGLSAG  
VGRDIIITAARLGISGTARGAAGRVAVAVSINNQDAGVICPTADGAFGPVDLPLSPMFLDTRNRINFRLF  
LRAPQPADPSAPACGPDARGRDGSAAQVSDPGVQVVISPRSTLTLTTVGLVPHRLLSALPYVLDPDAA  
RTAAVTFVLPGGRDPAQLEAAGMVASWLGLQSRESGIHFNVAAIPPDQGSAAVAIAPGQPGPWGRAPA  
GPALAVMPNPHDRFGTVLVVTGRTPAEVRTAAQALVLGAEHDAFGAFAAAPVVHPPARQPYDAPGV  
VRTDRPVTRELVTAAALRTRGLTSGTLDIALSLPDLRSWRSRPFMARLQISAPEGGVLDRAKSRVSITL  
NGTYLHSYPLVPLSLNPFRTPGAPVEHDLPLVWKMARHNELRLYFDVHPRHMTDAAAAASDAVVE  
LDPSTIDFSKSRHFAVLDPVALFAASAFPFSRMADLSETTVLLPPHPADGTVGAFVDMMGFAGAISRY  
ATGVTVRATDMPVDASVTGDILLSTLDGLGNGRAALARAGCVRAPSLARLARVTQGRDVPACDF  
TQGALVAAQSPFAAQRSVVAVLGGTPDALSAMVRDLRDPADTPRFQGDMVIRHGARLDSYRTGGLYT  
VGNMPAWMLPDWYLGGHPLLLCGLGGLAALCGTSCAMRVLGARSRRRILNDDLTGDL

>bcsC3 (encoding gene at position 2136184:2139981 bp)

MPDGFAMPCRAFMPVGRPVRRARMWGGVVLGALCLYMPRAEAQTPLRYAETILDGQIEEGAFWIHH  
GDDMHALHALQRALRIEADNLEAGLMLGAVQVHQNDMAGARATLQALQAQPGAQAQVAALRGW  
IGQAPIDPAALANARSAADTGKKLQATLLYRAVFQGAHPLPDMELEYDRVLSGSLSGYTEATQRLRAL  
GALLPHDLEIRMALAQALSYRPATRPDAIEDMRQLATAATTPDFIRGEVMQSWRRRTLEWMGADPQAE  
PYYQEWLALHPDDTEIASRLKAEQAARAQAARLALVGAGYHALAHGELEQAERDFSSSMGTDPPRPE  
ALEGLGLVAQRRGDIPAARRWLEQARALAPDDAGIRNALAGLDAPGGDPQLARLWALVARHQYDE  
AQAMLPAVEKDHGRIADTLRVRAIIAHARHELPRAEA WRAVLRLVPGDLPAAAALSDVLIIEGRITE  
AEGWVARLRAAHYPGVTGLEAGVLGAMAENEPDQARRALLLEQALRDAPHNGWLRLHLAQLWLA  
RGQATRARALMAPLCNLPPKTDDETQVCFAFALQDQDMPRADALLARLPRADITAQMADGVAQVR  
LWHQISHLPDDAQAVPMLEHMPVVPDPEGTQARLVVNALLTRHAPVTAAAGVLHRLALADSAGHV  
SVNQSLSYAGLFMQIDDPVAAQQVLDGLPAVARGRRLTPTQARDLRDMTRSLAIAQADRDDIGGHPD  
AARRLLDPLLAQGPDDADLLARGRVEAALRQPAQAVVYDQKALAIRPDDTMAQAALARDSLASGH  
EQAARAMARTLQATHPQWGDTWEIQAEIAGLDGRDRRLADVQRARALDCTPRDDGDDSTGYGTRI

DAGCAPYRAHAGDEWPDIGTNFVPGMGAGMPEVYHYDPSLTPVQALDRQADYLQRALVPQADGNL  
EIRDRSGQPGLGHMTVVNIPMTAIVPFSSTQHQLALSVMPSVLMMSGDPLASGATAQQYGSVAAGGVRP  
GFHVPAAVAGVALSAHYQWRWVAADV GSTPLGFTTTNVLGGIELAPHLTHSLTLRLTGERRAVTDSL  
LAYSGARDPATGRVWGGVTRNRGHGQLEWAQPGYNLYAGGGYAVMQGHTTVANHEAEAGAGGS  
GLLWHRQDAQHLRLGLDLVYFGYRRNTYFFTWGQGGYFSPHAFMAALVPLTYDGHAGRWTWLFRC  
EAGYQHYTEHATAMFPLGEGGAMAGQRYAGQSTGGLAGNVLARAVYQLTPALRLGVEGGYSRSGS  
WDEVHGMLMLHYAPG

>bcsAB4 (encoding gene at position 2248494:2253065 bp)

MLRELWLKWGGEALLTPRRQAWLIAALLMVVGAVLCVSVGDITLAPAEQAYISIGTITLFFILNRRPGR  
HITCILMMLSLFVSFRYLIWRLGSTVEFHGPLQVAMSLALLGAEGYALSTLCLSYFQMSWPLGRKPHRLP  
DDPADWPMVDVYVPSYNEDLELVRSTVLGAMDHLWHPADKLNVIYILDDGRRKAFRDFAVESGAGYIIR  
AENNHAKAGNLNHAMQITKGEFVVFDCDHVPTRSFLLKTIGWLWADPKLALLQTPHHFYSPDPFQR  
NLAAGYDVPPEGNMFYGLIQDGNDFWDATFFCGSCAAIRRSALLSVGGFATETVTEDAHTALKMQRK  
GWGTAYLCQPLAAGLATERLILHIGQVRWRARGMLQIMRRDNPMLGGLRWEQRLCYLSAMSHFLF  
AIPRVTFVLVSPLGFLFFGQNIIAASPF AIMVYALPHIFHSIMTSLRIEGRWRYSFWSEIYETSLALFLIRITIVT  
LLQPHKGKFNVTDKGGLLARGYFDFSAVYPNAIMAILFGGMVRGIWGMIFQYHQKLAFQSFALNTL  
WITVSLIVVLASIAVGRETRQIRHKPRVRVKLPVEVCFADGRVFQAHTTDISLGGAGVTMHLPEQIETPV  
DITLRYSKPDDGIDIAVPARILGQQRGSWLHLQWKLDTLEEEREVSVSLVFGRSDAWHNWADFKDDRPL  
NSIYQVIKSIGGLAPPYLWSLPSKGQEESSESVHKEETLEKKSLVIPPVPHRLGTGIIMLLVGAMLAIPA  
RAQMPPGYSHTGVSHTLPLGDTNSGDIPATDTLDQKLADRVADAEITRTIAFRDLSRFPGPLTLRGFSP  
LQGVDDVVVPANRVVTHATLHLSGAISPSLLPEATAITVTLNEQYVGTIRIDPAHPTFGPIEFSIDPLYFTGD  
SKLNFRFAGEYRRDCNDLYNDVLWAQISDQSTITLTARIEPVRSLSRLPTPFDSNLKVAMRVPMVLP  
SAMAPEVLRAGGLVASWFGRLADTRQLTFPVARTLPDTGNAIEIGPRIAIDDRGTPPSGPTLFEIANPND  
KWGTILVVTGRTPAEVEVAARTLVFSPDTLGDLP GAVVEDVTLRPRVAYDAPSFIPTRPVRVFGELVTA  
GDLQAGGFAPDTLHVFPFHLPPDLYTWHRLPFLMDLVWRAPGNPVVDIAASRLDVSNNNTYIQSYSL  
NNNLWRIWSERMVTEHAGAVGHVTAIPPWLLFGQNDLQFQFDTRPVERGACRRTPDSPHLEIDSDSV  
LDFRRGVHFTELPNLSYFAEIGFPFSRMADLGETTVVLPPAPD TDIGAYFDLMGFFGSVTWYPVSGIHL  
ATTEDIAHTPPEGDVILLAPVGQMGAATLLSR SAYRIDGDHIRVGQQTGLQGIWYIFQDRDGSGLRN  
GVTANLDMPVRNAALMIGSESPYASHRSVLALVGDNGIRIHELVASLHDPKVLPTIQGDLVIKNGEHFT  
TYRTSPTYTVGHLPWWMWVDWFLSRHPMLMYLCGVTGAVMLGTGAWLWLRARARRRVKAQEKLD  
EETARGEHH

>NAD-dependent malic enzyme (encoding gene at position 1377838:1379562 bp)

MSDTAHFPGQVPLHTALSGRELLDCPVLNKGNAFDRRERDLFGLHGLLPARIATLAEQVDLACMRLA  
ALPDNFARHIALREIQDRNETLFYAIIDQAPESWLPIIYTPAIGRACQQFSQIWTRPRGLFLNYTDRGRIA  
EILASPQWDGVRVIVASDGG SILGIGDQGANMAIPIGKLSLYTACGGLDPACALPVLLDVGTDNAALL  
ADPDYIGWRHARVRGAEYDAFIAEFVTAVAARWPDIALHWEDLSGADALRILRRYRGS LCTYNDDIQ  
GTAGVTAGALLAAIRAGAAPLADQRIVIFGAGGAGCGIADLLAQMMVRAGMAAHEARSRFFMVDIN  
GLVRHGMIEGVTEGQMPFAQPADVAADWQVADPAHVTLAEVMAHVCPTTLIGTSGQGGAFTRQIVA  
PMARQAARPVVFALS NPTANIEALPADLLEWTDGRAIIGTGGPFAPVTHAGRTRPVDQINN SYVFPGV

GLAVMAGGITRMTDGMFLAAADALAGLSPAVGAGGGHDAALLPPVSALRPVAMAVARAVIRQGQA  
EGVAPAMPETGIGAMLAAAMWSPRYRPYEKTPPARP

>Pyruvate phosphate dikinase (encoding gene at position 2567253:2569928 bp)

MTKWVYSFGDGLNEGRADMNRNLLGGKGANLAEMAANGLPVPPGFTITTEVCSAFYENGRKYPDELK  
AQVDAALQRVEQSMGLRFGDPEAPLLVSVRSGARVSMPGMMMDTVLNLGLNDQTVEGLARSSGDARF  
AWDSYRRFIQMYGSVVMGVPHHHFEDVLEQFKRANNVEDDDTAITAGQWRAIVVDYTHIITHTGTDF  
PTNPQDQLWGAIGAVFGSWMNPRANTYRKLHEIPASWGTAVNVQSMVFGNMGDDCATGVCFTRDP  
STGENIFYGEYLINAQGEDVVAGIRTPQPMACARAEAGQHPMETTLPQAYAELLRVRISILETHYKDMQ  
DIEFTVQRNVLYILQTRNGKRTAAAALKIAIDMAREGLITQEEAIQRVPAASLDQLLHPTLDPRAERVQL  
TRGLPASPGAAAGAVVFTAEECEARAAGKEDVILVRIETSPEDVHGMHAARGVLTTRGGMTSHAADV  
ARGMGRVCVAGAGGIHVDYAAGSLSVGSHTVKEGEWITLDGGTGAVYLGRVPTIEPVLSDDFNTLMG  
WADGVRRRLGVRANAETPDDARTARRFGAEGIGLARTEHMFPGPDRIGFVRQMIIADEESVRQKAIAAL  
LPFQREDFASLFRIMAGLPVTVRLLDPPLHEFLPHEAAEMA EVAQALGRSVEDVRARCAALAETNPML  
GHRGCRLGLTSPEIYAMQVRALIQA AVLVEKELGRPIHPEIMIPLVATKAELATTRAAEDEIARVLKEE  
GTNLSYSIGTMIELPRAAIQADQIAEYADFFSFGTNDLTQTTFGLSRDDAGSFLPYVVDQGLLPRDPFVSI  
DRDGVGALVRLGVERGRQTSADLKLKLGICGEHGGDPDSIAFFDEVGLDYVSCSPFRVPVARLAAAQAAL  
ATRQKAASPA
